# Supplementary material for: HIV-1 Vaccine-elicited Antibodies Reverted to Their Inferred Naive Germline Reveal Associations between Binding Affinity and in vivo Activation
Source: PubMed Central journal article supplement (PMC4754655; doi:10.1038/srep20987), 2016-02-16
Supplement: srep20987-s1.pdf [file srep20987-s1.pdf]

## **HIV-1 Vaccine-elicited Antibodies Reverted to Their Inferred Naive Germline Reveal Associations between Binding Affinity and *in vivo* Activation**

Kaifan Dai<sup>1,2\*</sup>, Salar N Khan<sup>1,2\*</sup>, Yimeng Wang<sup>2</sup>, Linling He<sup>2</sup>, Javier Guenaga<sup>1,2</sup>, Jidnyasa Ingale<sup>1,2,3</sup>, Christopher Sundling<sup>4</sup>, Sijy O'Dell<sup>5</sup>, Krisha McKee<sup>5</sup>, Ganesh Phad<sup>4</sup>, Martin Corcoran<sup>4</sup>, Richard Wilson<sup>1,2</sup>, John R Mascola<sup>5</sup>, Jiang Zhu<sup>1,2,3</sup>, Yuxing Li<sup>1,2</sup>, Gunilla B Karlsson Hedestam<sup>4</sup> and Richard T Wyatt<sup>1,2,3#</sup>

<sup>1</sup>IAVI Neutralizing Antibody Center at TSRI, La Jolla CA; <sup>2</sup>Department of Immunology and Microbial Science, <sup>3</sup>the Scripps CHAVI-ID, The Scripps Research Institute, La Jolla CA; <sup>4</sup>Department of Microbiology and Tumor Cell Biology, Karolinska Institutet, Stockholm SE; <sup>5</sup>Vaccine Research Center, Bethesda MD

\*Contributed equally

#Corresponding author information: phone: 858 784 7676; email: [wyatt@scripps.edu](mailto:wyatt@scripps.edu) or [rw Wyatt@iavi.org](mailto:rw Wyatt@iavi.org); 10550 N Torrey Pines Rd, IMM 28, La Jolla CA 92037

Supplementary Figures:

| Name    | Sequence (5' - 3')     |                         |
|---------|------------------------|-------------------------|
|         | Heavy chain            | Light chain             |
|         | Forward                |                         |
| GEBT383 | CCTGTGGTTCTTCTCCTCCTG  | CTCCTCTCCTCCTCACTCTCC   |
| GEBT391 | TCACCATGAAGTTTGGGCTGAG | GCTCCTGCTGCTCTGGC       |
| GEBT393 | CCATGAAGTTTGGGCTGAG    | GGTAAGGAAGGAGAACAGTAGGA |
| GEBT403 | CCCCAGAGCACAGCACCTCA   | TCCTCCTCACCCCTTCTCATT   |
| GEBT404 | GGCCTGAGCTGGGTTTTCC    | TTAATTGTGTGGACATCTGTT   |
| GEBT412 | GGCTGAGCTGGGTTTTCT     | CCTGCTGCTCTGGCTCCC      |
| GEBT414 | CATTTCTGTCTCCACCACGATG | ATGAGGGTCCCCGTTGAGC     |
|         | Reverse                |                         |
| GEBT383 | CTCCCTGCACCTGCTCCTG    | GCCCTGTTCTGATTCTGA      |
| GEBT391 | GAGGTTCCCTGGGGAAGTGT   | GTCCCCTTCTACCGACACC     |
| GEBT393 | GTTCCCTGGGGAAGTGT      | TTGGGATGCAGAGGTGAC      |
| GEBT403 | TAATATTTCTATATAATT     | GAAGGAAGCAGCAGCCACAGA   |
| GEBT404 | GATGACGTCCCACATCCTGACA | GACTTTCAAATCTGACTGAGTTT |
| GEBT412 | GAAGATGACGTCCCACATCC   | CTTCTACCGACACCATCAGAG   |
| GEBT414 | TCCACCTCCCATGGTTAGGTCC | GGTGCAGAGGTGACTTCAT     |

Table S1 . PCR primers used for genomic sequence amplification

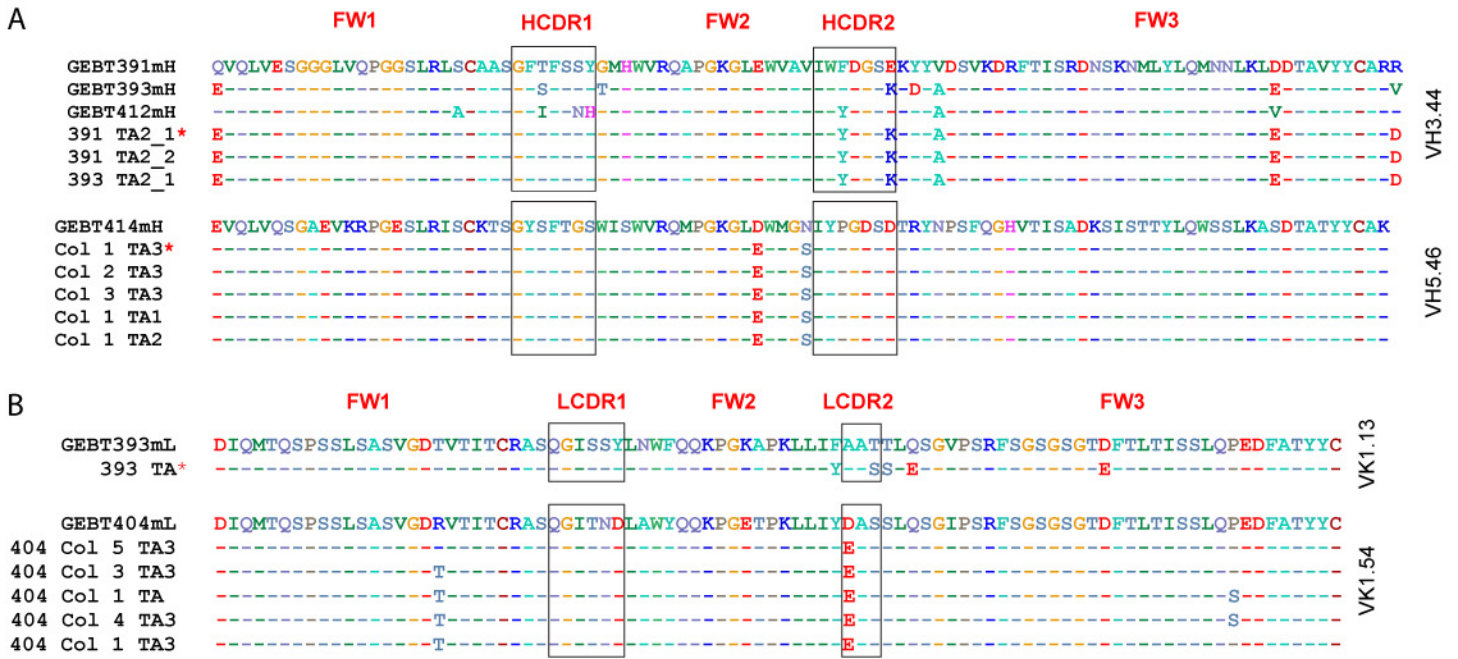

**Figure S1 . Unique VH gene sequences (A) and VL gene sequences (B) obtained from NHP F128 T cell genomic DNA amplification and TA cloning.** The first sequence in each gene family is the mature version and the sequences that follow are the TA clones. The closest germline genes as currently named in IMGT are shown on the right. The “\*” indicates the clone’s sequence which was used in the construction of the igL antibody. Sequences from 404 were analyzed but not used because the published database was the same except for one change and we decided to use it. Col - refers to colony.

### Heavy chain amino acid alignment

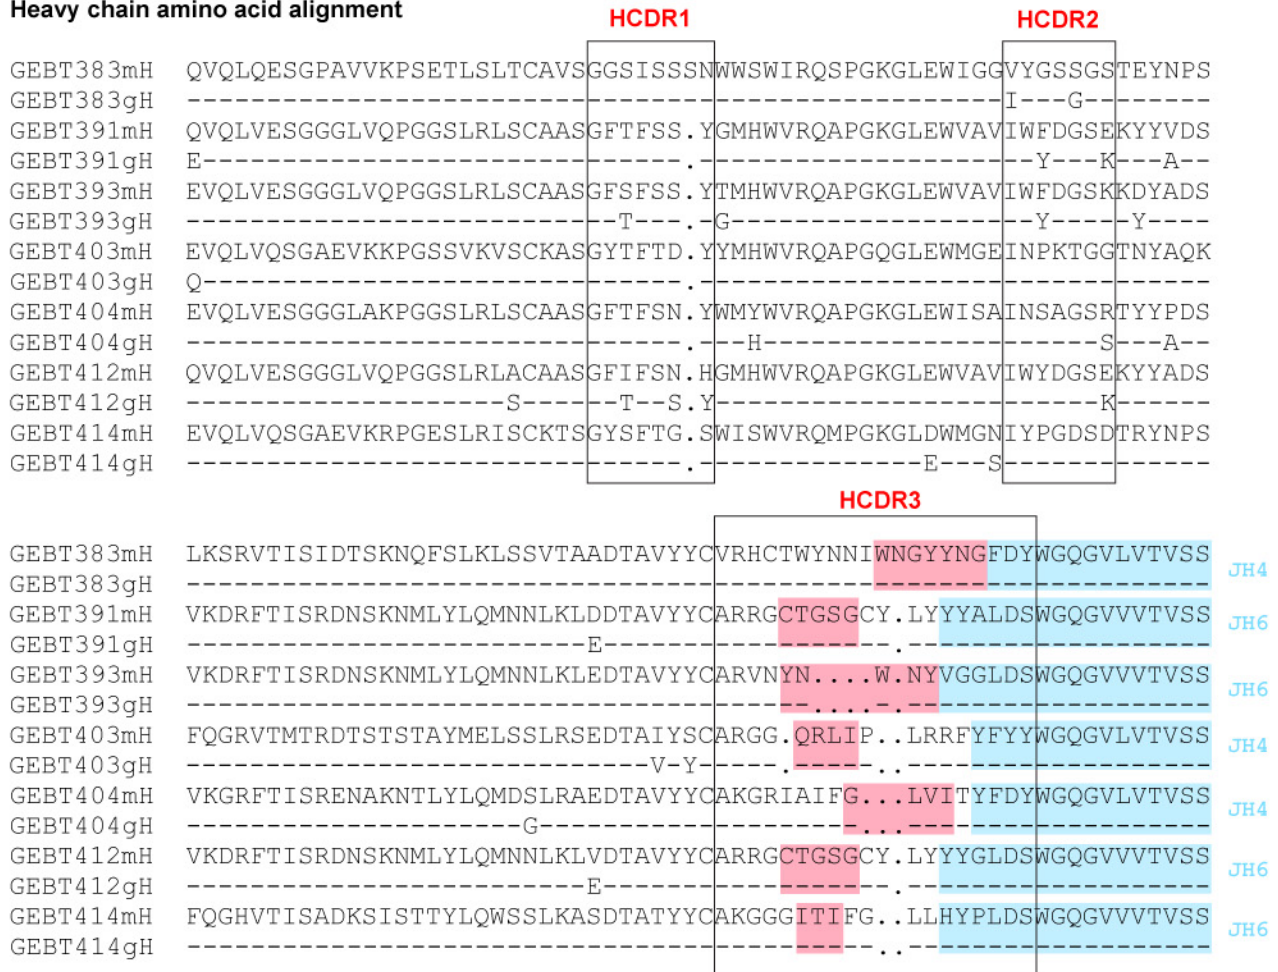

**Figure S2. Amino acid alignment of the antibodies.** mH (mature heavy chain) is shown on top with the corresponding gH (germline heavy chain) compared below with only the changes highlighted. DH and JH regions are boxed in red and blue respectively.

**Light chain amino acid alignment**

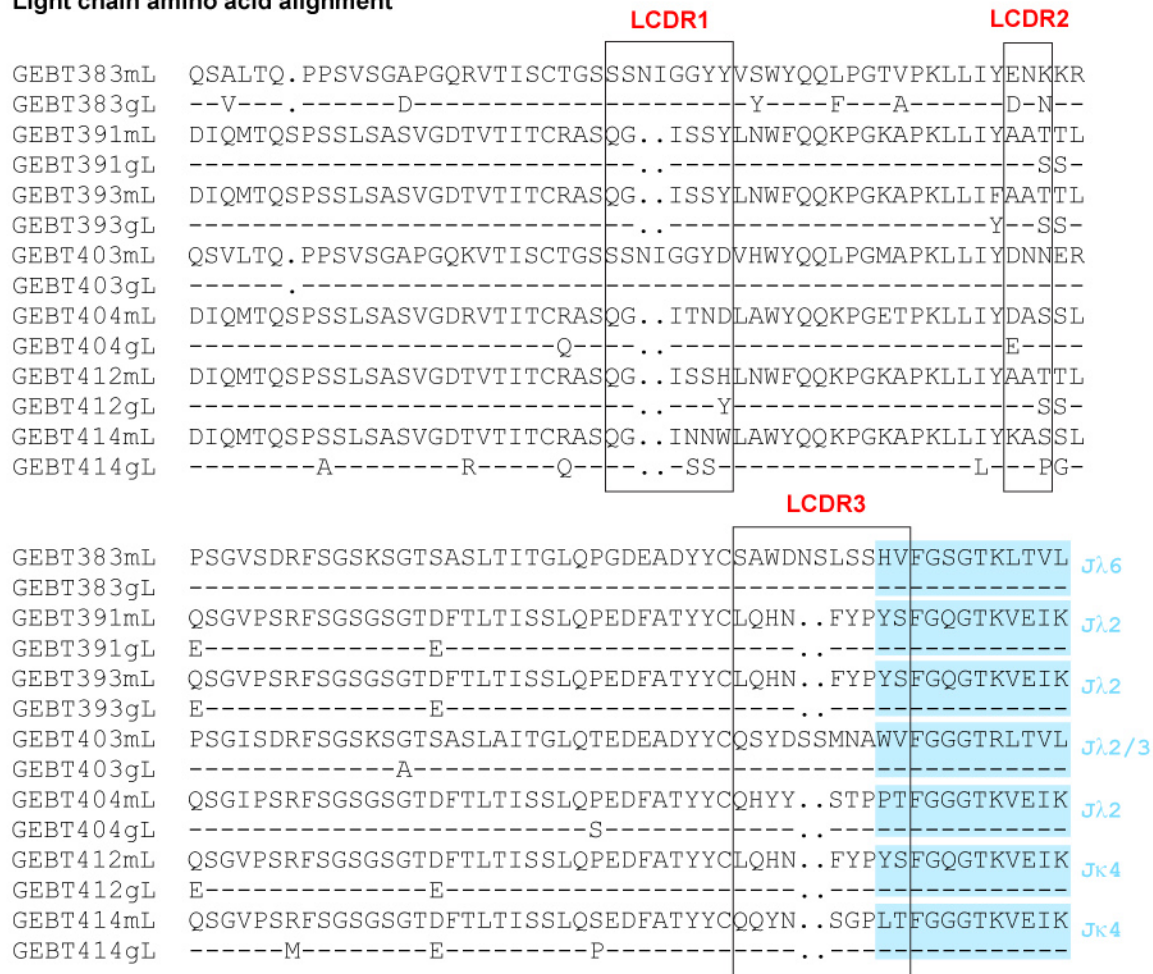

**Figure S3 . Amino acid alignment of the antibodies.** mL (mature light chain) is shown on top with the corresponding gL (germline light chain) compared below with only the changes highlighted. JL regions are boxed blue.

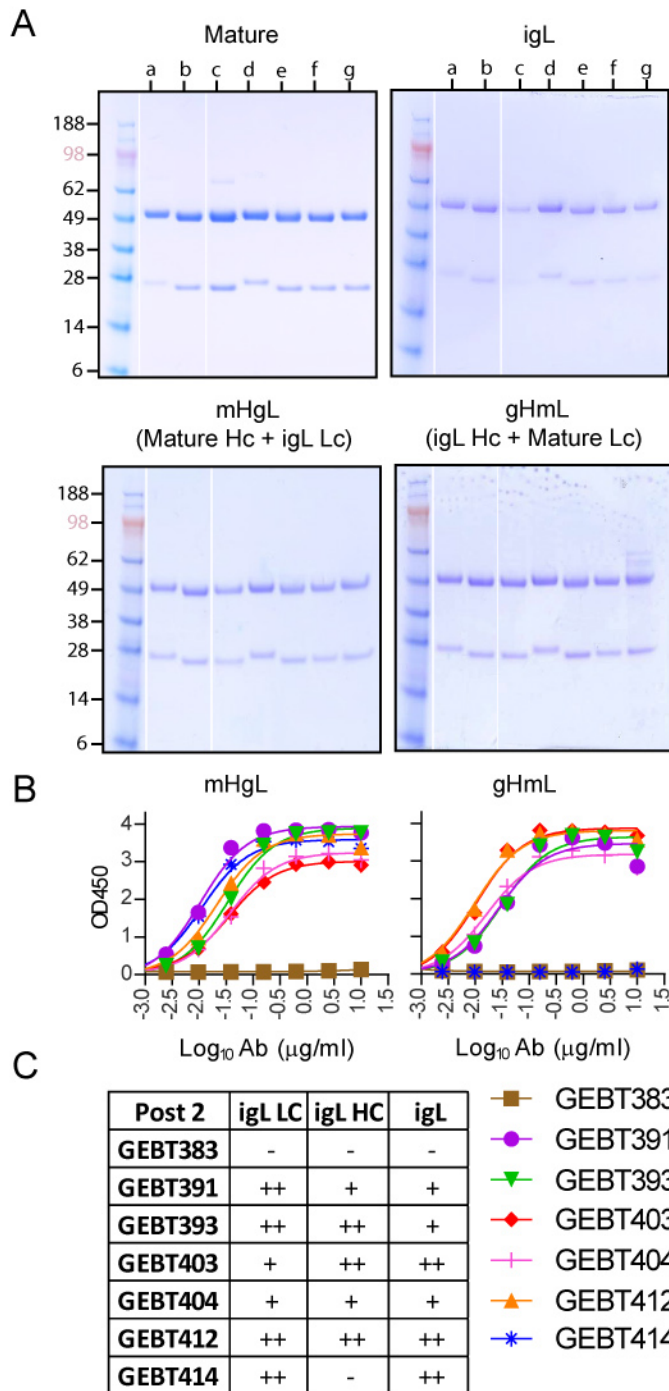

**Figure S4. Reducing gels of all antibodies in the study and chimeric antibody binding to YU2 gp140-F.**  
 (A) Heavy and light chains of mature, igL and chimeric antibodies (a-g) on reducing gels. (B) Chimeric IgG binding to YU2 gp140-F by ELISA. (C) Chimeric antibody binding to gp140-F is depicted as a table.

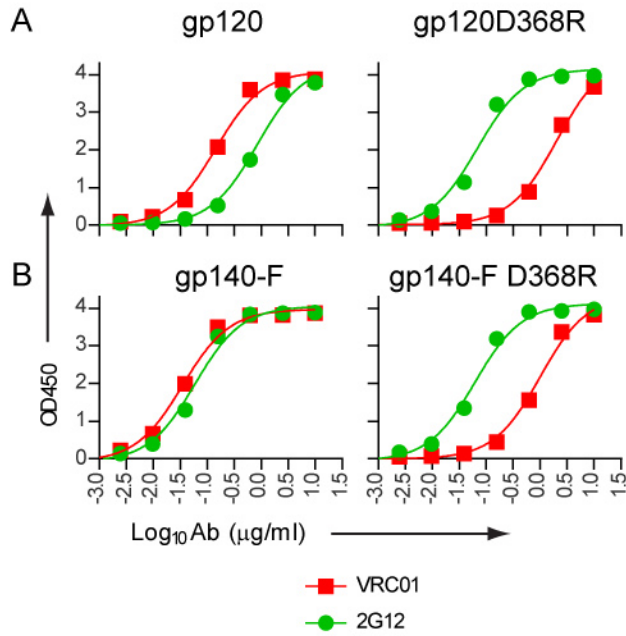

**Figure S5. ELISA binding curves of the positive control antibodies.** VRC01 and 2G12 antibodies binding to gp120 (A), gp140-F (B) and to the corresponding D368R mutants.

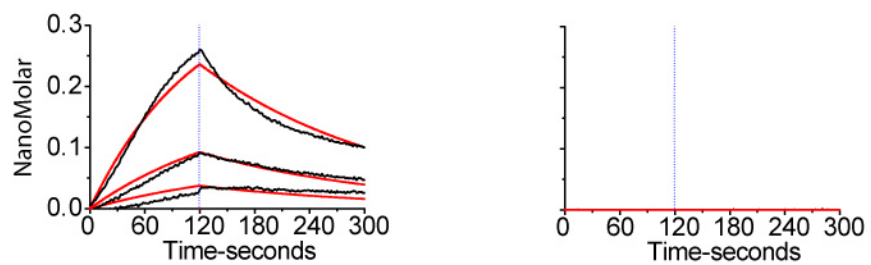

**Figure S6. Binding analysis of GEBT 383.**

GEBT383 antibody binds to His-Tag (left) and not to the control protein without the His-tag (right).



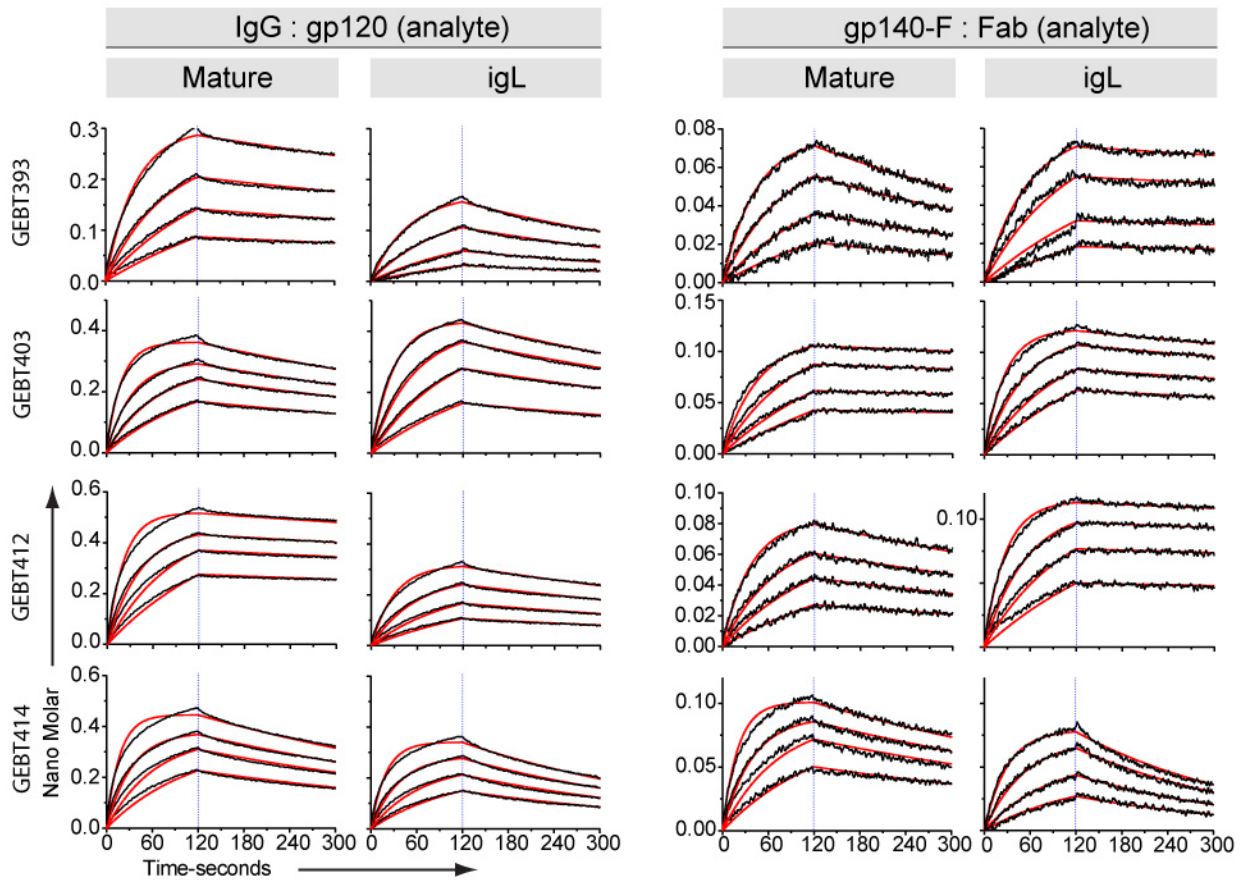

**Figure S7. BLI binding curves of the antibodies.** Mature and igL IgG binding to gp120 (two panels on left), and the same antibodies as Fabs binding to gp140-F (two panels on right).

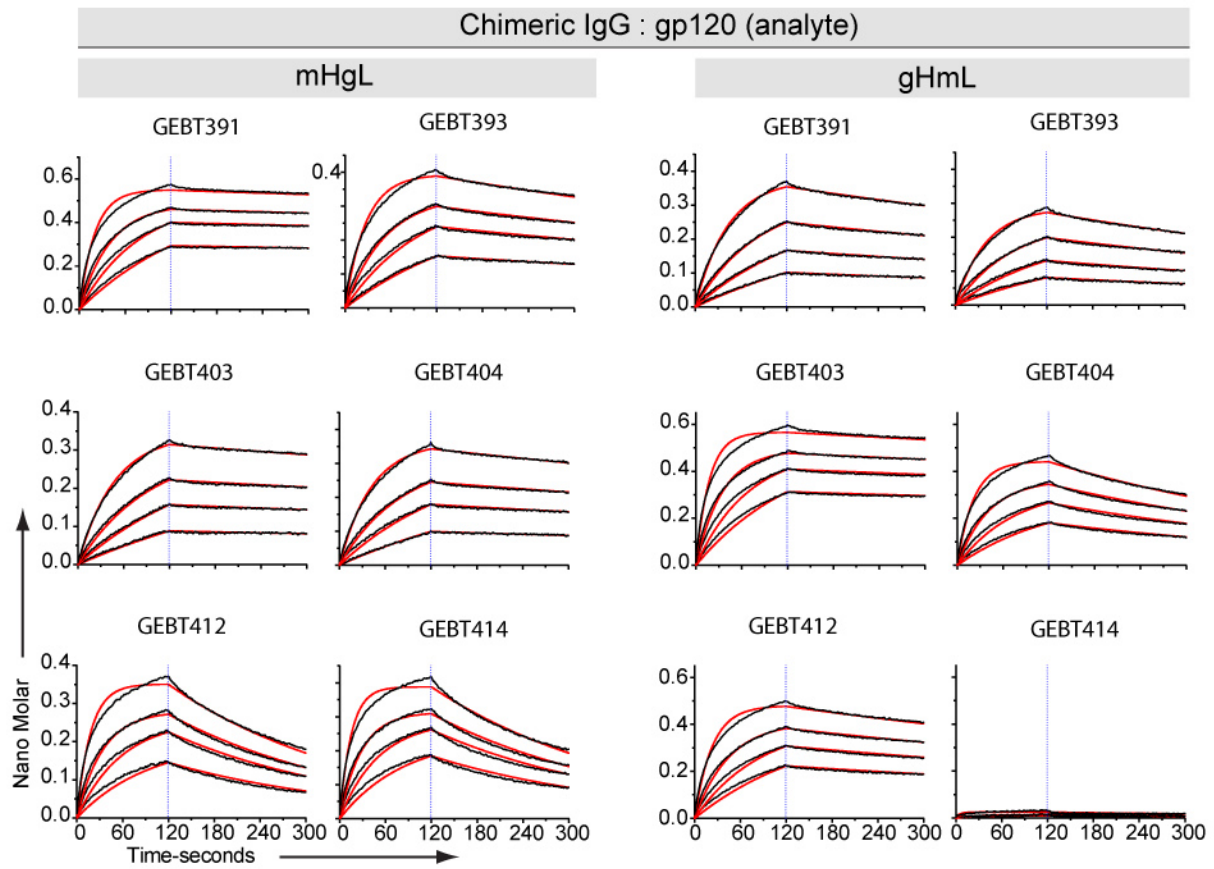

**Figure S8. BLI binding curves of the antibodies.** Chimeric IgG binding to gp120. mHgL - mature heavy chain and igL light chain. gHmL - igL heavy chain and mature light chain.

A

| BLI                            | kD (nM)               | kon(1/Ms) | kdis(1/s) | kD (nM) | kon(1/Ms) | kdis(1/s) |
|--------------------------------|-----------------------|-----------|-----------|---------|-----------|-----------|
|                                | IgG : gp120 (analyte) |           |           |         |           |           |
|                                | IgL                   |           |           | Mature  |           |           |
| GEBT391                        | 118                   | 1.72E+04  | 2.04E-03  | 6       | 9.21E+04  | 5.58E-04  |
| GEBT393                        | 146                   | 1.76E+04  | 2.57E-03  | 15      | 5.74E+04  | 8.32E-04  |
| GEBT403                        | 11                    | 1.34E+05  | 1.47E-03  | 13      | 1.14E+05  | 1.50E-03  |
| GEBT404                        | 56                    | 4.95E+04  | 2.79E-03  | 43      | 9.08E+04  | 3.91E-03  |
| GEBT412                        | 104                   | 2.84E+04  | 2.95E-03  | 11      | 8.38E+04  | 8.85E-04  |
| GEBT414                        | 63                    | 4.86E+04  | 3.05E-03  | 24      | 1.13E+05  | 2.74E-03  |
| Fab : gp140-F (analyte)        |                       |           |           |         |           |           |
|                                |                       |           |           |         |           |           |
| IgL                            |                       |           | Mature    |         |           |           |
| GEBT391                        | 86                    | 1.78E+04  | 1.53E-03  | 2       | 1.61E+05  | 3.31E-04  |
| GEBT393                        | 101                   | 2.11E+04  | 2.14E-03  | 5       | 7.07E+04  | 3.65E-04  |
| GEBT403                        | 2                     | 1.71E+05  | 3.06E-04  | 5       | 1.16E+05  | 5.86E-04  |
| GEBT404                        | 32                    | 9.85E+04  | 3.10E-03  | 7       | 1.22E+05  | 9.08E-04  |
| GEBT412                        | 55                    | 2.61E+04  | 1.43E-03  | 2       | 1.47E+05  | 2.28E-04  |
| GEBT414                        | 36                    | 1.20E+05  | 4.24E-03  | 9       | 1.94E+05  | 1.75E-03  |
| Chimeric IgG : gp120 (analyte) |                       |           |           |         |           |           |
|                                |                       |           |           |         |           |           |
| gHmL                           |                       |           | mHgL      |         |           |           |
| GEBT391                        | 42                    | 2.26E+04  | 9.47E-04  | 4       | 4.98E+04  | 2.08E-04  |
| GEBT393                        | 59                    | 2.43E+04  | 1.42E-03  | 24      | 2.06E+04  | 4.96E-04  |
| GEBT403                        | 5                     | 5.76E+04  | 3.12E-04  | 77      | 5.19E+04  | 4.01E-03  |
| GEBT404                        | 50                    | 4.47E+04  | 2.23E-03  | 26      | 3.64E+04  | 9.59E-04  |
| GEBT412                        | 22                    | 4.31E+04  | 9.35E-04  | 31      | 2.32E+04  | 7.12E-04  |
| GEBT414                        | LB                    | -         | -         | 61      | 6.33E+04  | 3.88E-03  |

B

| SPR     | kD (nM)                 | kon(1/Ms) | kdis(1/s) | kD (nM) | kon(1/Ms) | kdis(1/s) |
|---------|-------------------------|-----------|-----------|---------|-----------|-----------|
|         | Fab : gp140-F (analyte) |           |           |         |           |           |
|         | IgL                     |           |           | Mature  |           |           |
| GEBT391 | 30                      | 9.53E+05  | 2.83E-02  | 27      | 6.19E+04  | 1.64E-03  |
| GEBT393 | 43                      | 9.09E+04  | 3.90E-03  | 12      | 2.06E+05  | 2.57E-03  |
| GEBT403 | 2                       | 2.57E+05  | 4.58E-04  | 7       | 2.28E+05  | 1.59E-03  |
| GEBT404 | 17                      | 1.23E+05  | 2.09E-03  | 7       | 2.62E+05  | 1.81E-03  |
| GEBT412 | 16                      | 1.77E+05  | 2.79E-03  | 2       | 2.84E+05  | 4.57E-03  |
| GEBT414 | 9                       | 1.34E+05  | 1.25E-03  | 6       | 1.21E+05  | 7.76E-04  |

**Figure S9. Binding affinity (kD), association rates (kon) and dissociation rates (koff) of the antibodies. (A) IgG, Fabs and chimeric IgGs by BLI and (B) Fabs by SPR. The values shown in green are a repetition of data shown in Figure 3. LB - Low binding.**

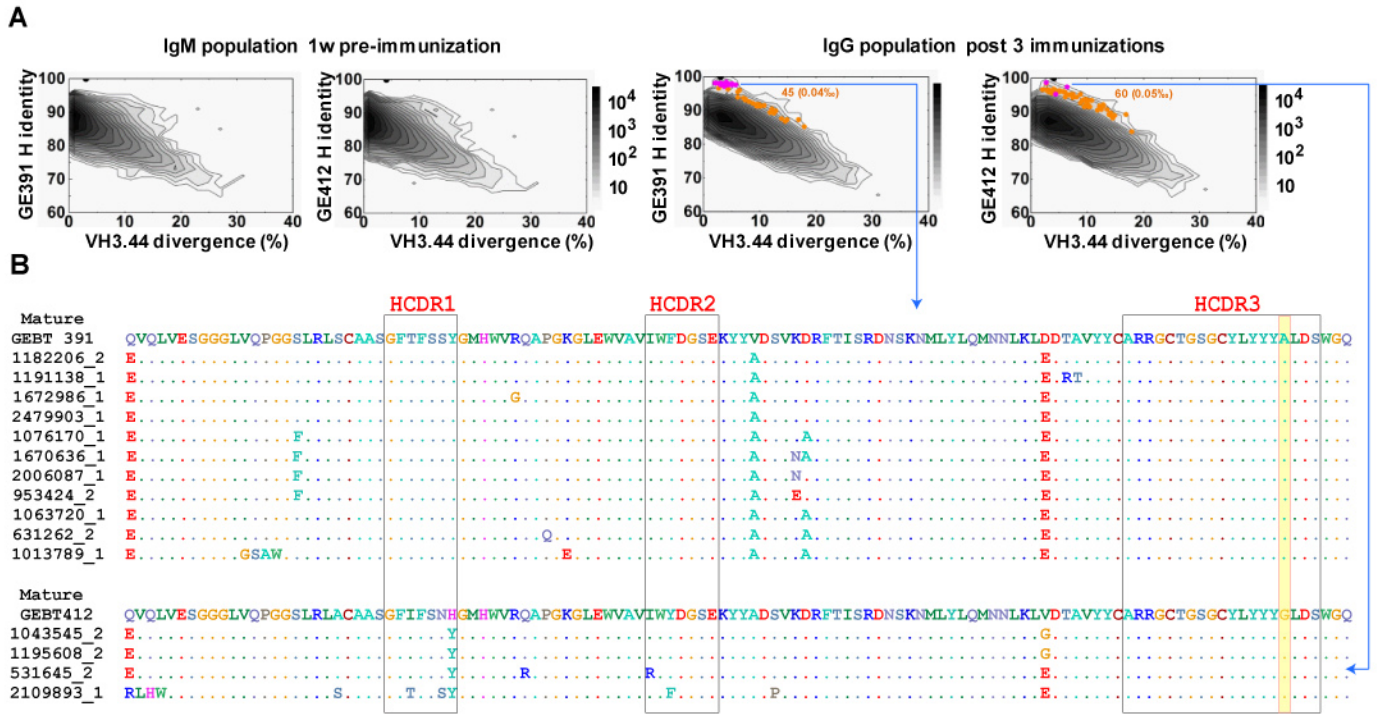

**Figure S10: Germline gene usage of the VH chains derived from the unbiased antibody repertoire 3 weeks after the 3rd inoculation during F128 immunization.** The distribution is plotted at the gene family level with the percent repertoire (%) labeled. (A) Identity/divergence analysis of heavy chain repertoires for CD4bs-directed mAbs isolated from F128 GE391 and GE412 is shown. The heavy chain population is plotted as a function of sequence identity to the template mAb and sequence divergence from putative germline V genes, with the template mAb labeled as a black dot on the plot partially visible at the top left corner of the plot. Color coding denotes sequence density. Sequences with an HCDR3 identity 95% or greater to the template mAb are shown in orange. The purple dots refer to matched sequences shown in B. (B) Alignments of sequences that show 100% HCDR3 identity to GE391 and GE412. The alignments were generated by the sequence alignment editor software, BioEdit.



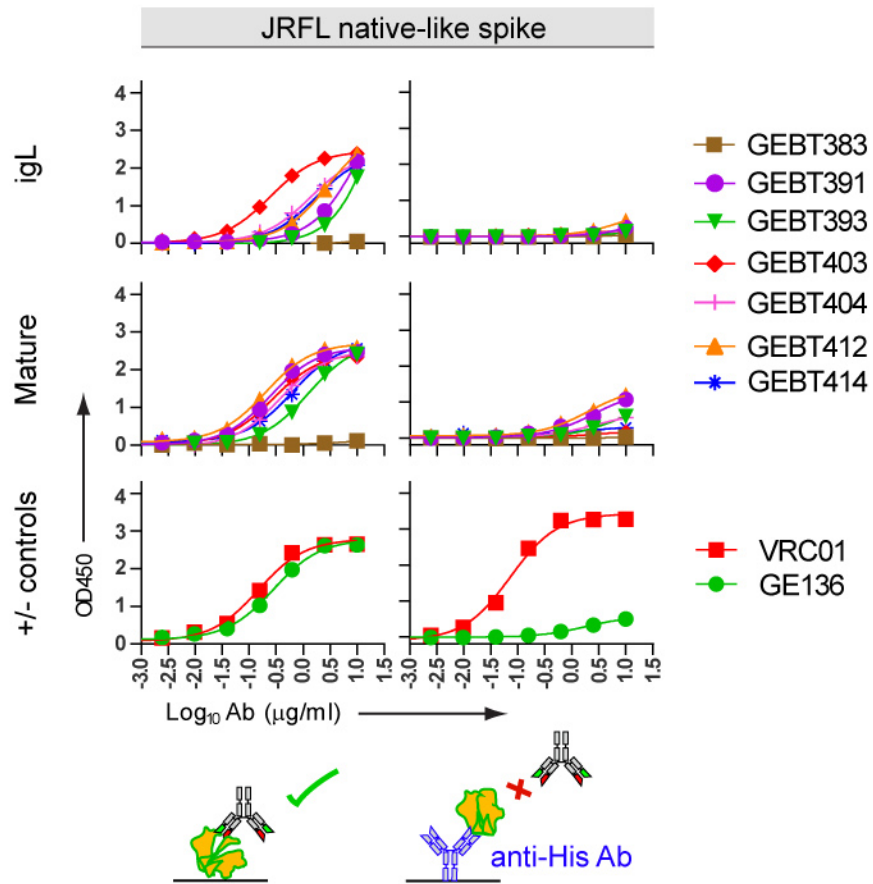

Figure S12. ELISA binding curves of igL and mature antibodies to JRFL-SOSIP native like spike that is either coated directly (left panels) or captured on a plate by anti-His antibody (right panels).

|                                              |         | Mature      |            | igL         |          |
|----------------------------------------------|---------|-------------|------------|-------------|----------|
|                                              |         | HxB2.DG.SG3 | MN.3.SG3   | HxB2.DG.SG4 | MN.3.SG4 |
| IgG                                          | GEBT383 | >50         | 15.1       | >50         | 11.3     |
|                                              | GEBT391 | 1.36        | 0.223      | >50         | >50      |
|                                              | GEBT393 | 5.10        | 45.0       | >50         | >50      |
|                                              | GEBT403 | 0.455       | 0.269      | 0.216       | 0.211    |
|                                              | GEBT404 | 3.57        | 18.1       | >50         | 17.5     |
|                                              | GEBT412 | 0.735       | 0.682      | 12.8        | 3.05     |
|                                              | GEBT414 | >50         | >50        | >50         | >50      |
| Fab                                          | GEBT383 | >50         | >50        | >50         | 16.8     |
|                                              | GEBT391 | 0.924       | 0.004      | >50         | >50      |
|                                              | GEBT393 | 13.7        | 1.11       | >50         | >50      |
|                                              | GEBT403 | 0.931       | 1.20       | 0.997       | >50      |
|                                              | GEBT404 | 5.53        | 0.469      | >50         | 49.9     |
|                                              | GEBT412 | 4.51        | >50        | >50         | >50      |
|                                              | GEBT414 | >50         | 2.29       | 16.4        | 2.62     |
|                                              |         | mHgL        |            | gHmL        |          |
| Chimeric IgG                                 | GEBT383 | >50         | >50        | >50         | 8.44     |
|                                              | GEBT391 | 0.669       | 0.256      | >50         | >50      |
|                                              | GEBT393 | 8.59        | 12.0       | >50         | >50      |
|                                              | GEBT403 | 0.380       | 0.320      | 0.510       | >50      |
|                                              | GEBT404 | 6.86        | >50        | 22.6        | >50      |
|                                              | GEBT412 | 5.57        | >50        | 14.0        | 0.668    |
|                                              | GEBT414 | >50         | >50        | >50         | 13.0     |
| +ve Control                                  | VRC01   | 0.014       | 0.067      |             |          |
| Color shading represents potency as follows: |         |             |            |             |          |
|                                              |         | <0.100      | 0.100-1.00 | 1.00-10.0   | >10.0    |

**Figure S13. IC-50 neutralization values are shown for IgG, Fabs and Chimeric IgG.**
